# Supplementary material for: Health Science Students' Knowledge, Attitude, and Readiness Towards Epidemiology Learning in the Gulf Cooperation Council (GCC) Region: A Multi-Institutional Study
Source: Research Square preprint supplement (doi:10.21203/rs.3.rs-7127217/v1), 2025-09-02
Supplement: Supplementary file 1 [file 394dc7a791e14d46e1422306.pdf]

# Week 1

Epidemiology class survey

---

\* Required

1. Are you a 'public health' or 'nutrition' student? \*

*Mark only one oval.*

☐ yes

☐ No

2. What year of the bachelor (undergraduate) program are you in? \*

*Mark only one oval.*

☐ 1

☐ 2

☐ 3

☐ 4

☐ 5

3. Which year did you start your current undergraduate education? \*

*Mark only one oval.*

☐ 2017

☐ 2018

☐ 2019

☐ 2020

☐ 2021

☐ 2022

4. Is this your 'first' university degree program? \*

*Mark only one oval.*

☐ Yes

☐ No

5. Prior to this semester, did you ever take a 'public health' course? \*

*Mark only one oval.*

☐ Yes

☐ No

6. Prior to this semester, did you ever take a 'statistics' course? \*

*Mark only one oval.*

☐ Yes

☐ No

7. Prior to this semester, did you ever take an 'epidemiology' course? \*

*Mark only one oval.*

☐ Yes

☐ No

8. Prior to this semester, did you ever take a 'management' or 'business' course? \*

*Mark only one oval.*

☐ Yes

☐ No

9. Prior to this semester, did you ever take a 'computer science' or 'information technology' course? \*

*Mark only one oval.*

☐ Yes

☐ No

10. Prior to this semester, did you ever take a 'research method' course? \*

*Mark only one oval.*

☐ Yes

☐ No

11. Do you have more than 15 credits of courses this semester? \*

*Mark only one oval.*

☐ Yes

☐ No

12. Do you have less than 10 credits of courses this semester? \*

*Mark only one oval.*

☐ Yes

☐ No

13. Do you know the meaning of the word, 'epi'? \*

*Mark only one oval.*

☐ Yes

☐ No

14. Do you know the meaning of the word, 'demos'? \*

*Mark only one oval.*

☐ Yes

☐ No

15. Is the word, 'epidemiology', Greek or Latin (Roman)? \*

*Mark only one oval.*

- ☐ Greek
- ☐ Latin
- ☐ Neither

16. What kind of 'science' is 'epidemiology'? \*

*Mark only one oval.*

- ☐ Soft
- ☐ Hard

17. What kind of 'research' is 'epidemiology'? \*

*Mark only one oval.*

- ☐ Basic (laboratory)
- ☐ Field

18. Is 'epidemiology' important for 'public health' student? \*

*Mark only one oval.*

☐ Yes

☐ No

19. Did COVID-19 make epidemiology a 'popular' science? \*

*Mark only one oval.*

☐ Yes

☐ No

☐ I do not know

20. Does epidemiology provide a toolbox for 'public health surveillance'? \*

*Mark only one oval.*

☐ Yes

☐ No

☐ I do not know

21. Does epidemiology provide a toolbox for 'clinical research'? \*

*Mark only one oval.*

- ☐ Yes
- ☐ No
- ☐ I do not know

22. Does epidemiology provide a toolbox for 'health services research'? \*

*Mark only one oval.*

- ☐ Yes
- ☐ No
- ☐ I do not know

23. Does the practice of 'epidemiology' require some knowledge of 'mathematics'? \*

*Mark only one oval.*

- ☐ Yes
- ☐ No
- ☐ I do not know



24. Does the practice of 'epidemiology' require some knowledge of 'statistics'? \*

*Mark only one oval.*

- ☐ Yes
- ☐ No
- ☐ I do not know

25. Does the practice of 'epidemiology' require some knowledge of informatics (information technology, computation, computer science)? \*

*Mark only one oval.*

- ☐ Yes
- ☐ No
- ☐ I do not know

26. Do you think one (1) epidemiology course is enough for a bachelor of public health or nutrition student? \*

*Mark only one oval.*

- ☐ Yes
- ☐ No

27. For the introductory epidemiology course, do you want number crunching (number calculations)? \*

*Mark only one oval.*

☐ Yes

☐ No

28. Can epidemiology be 'useful' for your future career? \*

*Mark only one oval.*

☐ Yes

☐ No

29. Do you want to be a full-time 'epidemiologist' after graduation from your current program? \*

*Mark only one oval.*

☐ Yes

☐ No

☐ Maybe

30. Do you want to be a part-time 'epidemiologist' after graduation from your current program? \*

*Mark only one oval.*

- ☐ Yes
- ☐ No
- ☐ Maybe

31. Do you know any epidemiologist 'other than' your current course instructor? \*

*Mark only one oval.*

- ☐ Yes
- ☐ No

32. Which one do you consider as the 'backbone' of 'public health'? \*

*Mark only one oval.*

- ☐ Health policy
- ☐ Healthcare economics
- ☐ Epidemiology

33. Which mode of (epidemiology) teaching do you prefer? \*

*Mark only one oval.*

- ☐ Online
- ☐ On-campus

34. Which type of course assessment do you prefer? \*

*Mark only one oval.*

- ☐ Test
- ☐ Essay

35. Do you want 'guest speaker' for the epidemiology class? \*

*Mark only one oval.*

- ☐ Yes
- ☐ No

36. Do you want Web portal (a Website with several links related to epidemiological analysis) for learning epidemiology? \*

*Mark only one oval.*

☐ Yes

☐ No

37. Does a 'public health manager' need to know epidemiology? \*

*Mark only one oval.*

☐ Yes

☐ No

☐ I do not know

38. Does a 'hospital manager' need to know epidemiology? \*

*Mark only one oval.*

☐ Yes

☐ No

☐ I do not know

39. Is epidemiology like 'accounting'? \*

*Mark only one oval.*

- ☐ Yes
- ☐ No
- ☐ I do not know

40. Is epidemiology like 'finance'? \*

*Mark only one oval.*

- ☐ Yes
- ☐ No
- ☐ I do not know

---

This content is neither created nor endorsed by Google.

Google Forms
